# Supplementary material
Source: PubMed Central journal article supplement (PMC4934735)
Supplement: JVI.00238-16_zjv999181672so3.pdf [file JVI.00238-16_zjv999181672so3.pdf]

**Analysis of the contribution of hemocytes and autophagy to *Drosophila* antiviral immunity.**  
***Lamiable et al***

---

**Supplemental movie 1:**

Hemocytes from transgenic adult flies (actin>mito-GFP cells in green) were incubated with S2 cells co-expressing cytoplasmic GFP and mCherry markers in green and magenta during 12 hours. NucBlue stained the DNA in blue. One picture was taken every 20 minutes during 12h, the time is indicated hh::mm.

**Supplemental movie 2:**

Hemocytes from transgenic adult flies (actin>mito-GFP cells in green) were incubated with CrPV infected S2 cells co-expressing cytoplasmic GFP and mCherry markers in green and magenta during 12 hours. NucBlue stained the DNA in blue. One picture was taken every 20 minutes during 12h, the time is indicated hh::mm.
